# Supplementary material for: Many-Dimensional Model of Adolescent School Enjoyment: A Test Using Machine Learning from Behavioral and Social-Emotional Problems
Source: MDPI journal article supplement (doi:10.3390/educsci13111103), 2023-11-01
Supplement: s1 [file s1]

Archive with 1 entries (1 files):
- education-2662677-supplementary.pdf
